# Supplementary material
Source: publisher figshare collection journal article supplement (https://acs.figshare.com/ndownloader/files/5735922)
Supplement: Supplementary file 1 [file 5735922]

 
data_2a(4) 
 
_publ_requested_journal           'Chemistry'
_publ_requested_category          FM

_audit_creation_method            SHELXL-97 
_chemical_name_systematic 
; 
 ? 
; 
_chemical_name_common             '(C28H22N2S6).(CH2Cl2)1.5' 
_chemical_melting_point           ? 
_chemical_formula_moiety          'C56 H44 N4 S12 , C3 Cl6' 
_chemical_formula_sum             'C59 H44 Cl6 N4 S12' 
_chemical_formula_weight          1406.22 
 
loop_ 
 _atom_type_symbol 
 _atom_type_description 
 _atom_type_scat_dispersion_real 
 _atom_type_scat_dispersion_imag 
 _atom_type_scat_source 
 'C'  'C'   0.0033   0.0016 
 'International Tables Vol C Tables 4.2.6.8 and 6.1.1.4' 
 'H'  'H'   0.0000   0.0000 
 'International Tables Vol C Tables 4.2.6.8 and 6.1.1.4' 
 'N'  'N'   0.0061   0.0033 
 'International Tables Vol C Tables 4.2.6.8 and 6.1.1.4' 
 'S'  'S'   0.1246   0.1234 
 'International Tables Vol C Tables 4.2.6.8 and 6.1.1.4' 
 'Cl'  'Cl'   0.1484   0.1585 
 'International Tables Vol C Tables 4.2.6.8 and 6.1.1.4' 
 
_symmetry_cell_setting            triclinic 
_symmetry_space_group_name_H-M    'P-1' 
 
loop_ 
 _symmetry_equiv_pos_as_xyz 
 'x, y, z' 
 '-x, -y, -z' 
 
_cell_length_a                    9.816(3) 
_cell_length_b                    12.585(2) 
_cell_length_c                    13.562(4) 
_cell_angle_alpha                 81.31(2) 
_cell_angle_beta                  79.61(3) 
_cell_angle_gamma                 84.68(2) 
_cell_volume                      1625.4(7) 
_cell_formula_units_Z             1 
_cell_measurement_temperature     293(2) 
_cell_measurement_reflns_used     25 
_cell_measurement_theta_min       6.24 
_cell_measurement_theta_max       26.97 
 
_exptl_crystal_description        parallepiped 
_exptl_crystal_colour             yellow 
_exptl_crystal_size_max           0.2 
_exptl_crystal_size_mid           0.2 
_exptl_crystal_size_min           0.2 
_exptl_crystal_density_meas       'not measured' 
_exptl_crystal_density_diffrn     1.437 
_exptl_crystal_density_method     'not measured' 
_exptl_crystal_F_000              720 
_exptl_absorpt_coefficient_mu     0.692 
_exptl_absorpt_correction_type    none 
_exptl_absorpt_correction_T_min   ? 
_exptl_absorpt_correction_T_max   ? 
_exptl_absorpt_process_details    ? 
 
_exptl_special_details 
; 
 ? 
; 
 
_diffrn_ambient_temperature       293(2) 
_diffrn_radiation_wavelength      0.71073 
_diffrn_radiation_type            MoK\a 
_diffrn_radiation_source          'fine-focus sealed tube' 
_diffrn_radiation_monochromator   graphite
_diffrn_measurement_device_type   'Enraf Nonius CAD4'  
_diffrn_measurement_method        \w--2\q
_diffrn_refln_scan_width          1.00
_diffrn_standards_number          3
_diffrn_standards_interval_time   60
_diffrn_standards_decay_%         0
_diffrn_reflns_number             7386 
_diffrn_reflns_av_R_equivalents   0.0406 
_diffrn_reflns_av_sigmaI/netI     0.1014 
_diffrn_reflns_limit_h_min        -12 
_diffrn_reflns_limit_h_max        12 
_diffrn_reflns_limit_k_min        -16 
_diffrn_reflns_limit_k_max        16 
_diffrn_reflns_limit_l_min        0 
_diffrn_reflns_limit_l_max        17 
_diffrn_reflns_theta_min          1.54 
_diffrn_reflns_theta_max          26.97 
_reflns_number_total              7084 
_reflns_number_gt                 4268 
_reflns_threshold_expression      >2sigma(I) 
 
_computing_data_collection        'CAD4 EXPRESS' 
_computing_cell_refinement        'CAD4 EXPRESS' 
_computing_data_reduction         'XCAD4 (Harms, 1993)' 
_computing_structure_solution     'SHELXS-97 (Sheldrick, 1990)' 
_computing_structure_refinement   'SHELXL-97 (Sheldrick, 1997)' 
_computing_molecular_graphics     'DIAMOND (Brandenburg, 1999)'
_computing_publication_material   'SHELXL-97 (Sheldrick, 1997)'
 
_refine_special_details 
; 
 Refinement of F^2^ against ALL reflections.  The weighted R-factor wR and 
 goodness of fit S are based on F^2^, conventional R-factors R are based 
 on F, with F set to zero for negative F^2^. The threshold expression of 
 F^2^ > 2sigma(F^2^) is used only for calculating R-factors(gt) etc. and is 
 not relevant to the choice of reflections for refinement.  R-factors based 
 on F^2^ are statistically about twice as large as those based on F, and R- 
 factors based on ALL data will be even larger. 
; 
 
_refine_ls_structure_factor_coef  Fsqd  
_refine_ls_matrix_type            full 
_refine_ls_weighting_scheme       calc  
_refine_ls_weighting_details 
 'calc w=1/[\s^2^(Fo^2^)+(0.0776P)^2^+2.1001P] where P=(Fo^2^+2Fc^2^)/3' 
_atom_sites_solution_primary      direct 
_atom_sites_solution_secondary    difmap 
_atom_sites_solution_hydrogens    geom 
_refine_ls_hydrogen_treatment     mixed 
_refine_ls_extinction_method      none 
_refine_ls_extinction_coef        ? 
_refine_ls_number_reflns          7084 
_refine_ls_number_parameters      388 
_refine_ls_number_restraints      0 
_refine_ls_R_factor_all           0.1645 
_refine_ls_R_factor_gt            0.0564 
_refine_ls_wR_factor_ref          0.1741 
_refine_ls_wR_factor_gt           0.1405 
_refine_ls_goodness_of_fit_ref    0.979 
_refine_ls_restrained_S_all       0.979 
_refine_ls_shift/su_max           0.001 
_refine_ls_shift/su_mean          0.001 
 
loop_ 
 _atom_site_label 
 _atom_site_type_symbol 
 _atom_site_fract_x 
 _atom_site_fract_y 
 _atom_site_fract_z 
 _atom_site_U_iso_or_equiv 
 _atom_site_adp_type 
 _atom_site_occupancy 
 _atom_site_symetry_multiplicity 
 _atom_site_calc_flag 
 _atom_site_refinement_flags 
 _atom_site_disorder_assembly 
 _atom_site_disorder_group 
S1 S 0.33951(13) 0.13632(10) 0.50714(9) 0.0440(3) Uani 1 1 d . . . 
S2 S 0.13620(15) -0.01873(10) 0.59965(10) 0.0527(4) Uani 1 1 d . . . 
S3 S 0.08855(14) 0.33538(10) 0.49457(10) 0.0478(3) Uani 1 1 d . . . 
S4 S 0.28540(15) 0.47060(10) 0.54192(10) 0.0521(4) Uani 1 1 d . . . 
S5 S 0.44196(15) 0.02327(12) 0.32648(10) 0.0546(4) Uani 1 1 d . . . 
S6 S 0.09344(17) 0.44770(12) 0.28338(12) 0.0645(4) Uani 1 1 d . . . 
N1 N -0.3616(7) 0.0563(5) 0.0791(5) 0.094(2) Uani 1 1 d . . . 
N2 N 0.5727(6) 0.3665(4) 0.0264(4) 0.0777(16) Uani 1 1 d . . . 
C1 C 0.2032(5) 0.1043(3) 0.6057(4) 0.0380(11) Uani 1 1 d . . . 
C2 C 0.2378(6) -0.0437(4) 0.4849(4) 0.0491(13) Uani 1 1 d . . . 
C3 C 0.3284(5) 0.0281(4) 0.4418(4) 0.0441(12) Uani 1 1 d . . . 
C4 C 0.3268(6) 0.0548(5) 0.2340(4) 0.0628(16) Uani 1 1 d . . . 
H4A H 0.3595 0.0118 0.1796 0.075 Uiso 1 1 calc R . . 
H4B H 0.2353 0.0327 0.2659 0.075 Uiso 1 1 calc R . . 
C5 C 0.3128(7) 0.1695(5) 0.1889(5) 0.0726(18) Uani 1 1 d . . . 
H5A H 0.2740 0.1737 0.1274 0.087 Uiso 1 1 calc R . . 
H5B H 0.4045 0.1968 0.1703 0.087 Uiso 1 1 calc R . . 
C6 C 0.2235(7) 0.2403(5) 0.2574(5) 0.0719(18) Uani 1 1 d . . . 
H6A H 0.2592 0.2333 0.3204 0.086 Uiso 1 1 calc R . . 
H6B H 0.1302 0.2156 0.2729 0.086 Uiso 1 1 calc R . . 
C7 C 0.2165(8) 0.3603(5) 0.2115(5) 0.0774(19) Uani 1 1 d . . . 
H7A H 0.1933 0.3655 0.1443 0.093 Uiso 1 1 calc R . . 
H7B H 0.3081 0.3866 0.2039 0.093 Uiso 1 1 calc R . . 
C8 C 0.1554(5) 0.4351(4) 0.3982(4) 0.0447(12) Uani 1 1 d . . . 
C9 C 0.2457(6) 0.4974(4) 0.4198(4) 0.0481(12) Uani 1 1 d . . . 
C10 C 0.1955(5) 0.3531(4) 0.5801(4) 0.0394(11) Uani 1 1 d . . . 
C11 C 0.2108(5) 0.2799(4) 0.6631(4) 0.0390(11) Uani 1 1 d . . . 
C12 C 0.1505(5) 0.1729(4) 0.6742(3) 0.0397(11) Uani 1 1 d . . . 
C13 C 0.0428(5) 0.1445(4) 0.7616(4) 0.0406(11) Uani 1 1 d . . . 
C14 C 0.0303(5) 0.0417(4) 0.8145(4) 0.0475(12) Uani 1 1 d . . . 
H14 H 0.0942 -0.0136 0.7945 0.057 Uiso 1 1 calc R . . 
C15 C -0.0739(6) 0.0190(4) 0.8956(4) 0.0537(14) Uani 1 1 d . . . 
H15 H -0.0804 -0.0508 0.9293 0.064 Uiso 1 1 calc R . . 
C16 C -0.1686(6) 0.1002(5) 0.9268(4) 0.0527(13) Uani 1 1 d . . . 
C17 C -0.1576(6) 0.2034(5) 0.8771(5) 0.0703(18) Uani 1 1 d . . . 
H17 H -0.2212 0.2585 0.8980 0.084 Uiso 1 1 calc R . . 
C18 C -0.0530(6) 0.2254(4) 0.7966(4) 0.0584(15) Uani 1 1 d . . . 
H18 H -0.0455 0.2958 0.7645 0.070 Uiso 1 1 calc R . . 
C19 C -0.2770(7) 0.0760(5) 1.0120(5) 0.0661(16) Uani 1 1 d . . . 
C20 C 0.2849(5) 0.3006(3) 0.7420(3) 0.0379(11) Uani 1 1 d . . . 
C21 C 0.2842(5) 0.4027(4) 0.7712(4) 0.0475(12) Uani 1 1 d . . . 
H21 H 0.2340 0.4603 0.7399 0.057 Uiso 1 1 calc R . . 
C22 C 0.3556(6) 0.4199(4) 0.8450(4) 0.0487(13) Uani 1 1 d . . . 
H22 H 0.3541 0.4886 0.8626 0.058 Uiso 1 1 calc R . . 
C23 C 0.4300(5) 0.3351(4) 0.8931(4) 0.0454(12) Uani 1 1 d . . . 
C24 C 0.4293(6) 0.2316(4) 0.8676(4) 0.0545(14) Uani 1 1 d . . . 
H24 H 0.4779 0.1739 0.9002 0.065 Uiso 1 1 calc R . . 
C25 C 0.3568(6) 0.2156(4) 0.7944(4) 0.0510(13) Uani 1 1 d . . . 
H25 H 0.3552 0.1462 0.7791 0.061 Uiso 1 1 calc R . . 
C26 C 0.5092(6) 0.3523(4) 0.9683(4) 0.0549(14) Uani 1 1 d . . . 
C27 C 0.2134(7) -0.1461(5) 0.4467(5) 0.0726(18) Uani 1 1 d . . . 
H27A H 0.1417 -0.1829 0.4933 0.109 Uiso 1 1 calc R . . 
H27B H 0.2975 -0.1918 0.4410 0.109 Uiso 1 1 calc R . . 
H27C H 0.1855 -0.1285 0.3816 0.109 Uiso 1 1 calc R . . 
C28 C 0.3182(7) 0.5873(4) 0.3520(4) 0.0682(17) Uani 1 1 d . . . 
H28A H 0.3776 0.6174 0.3880 0.102 Uiso 1 1 calc R . . 
H28B H 0.2507 0.6420 0.3306 0.102 Uiso 1 1 calc R . . 
H28C H 0.3729 0.5602 0.2938 0.102 Uiso 1 1 calc R . . 
Cl1 Cl 0.4341(4) 0.6755(2) 0.6612(2) 0.1608(13) Uani 1 1 d . . . 
Cl2A Cl 0.1548(9) 0.7357(6) 0.8142(7) 0.170(4) Uani 0.50 1 d P . . 
Cl2B Cl 0.1696(5) 0.7060(4) 0.7430(5) 0.1077(18) Uani 0.50 1 d P . . 
C29 C 0.3310(8) 0.7521(7) 0.7491(7) 0.106(3) Uani 1 1 d . . . 
Cl3 Cl -0.0612(6) 0.7083(5) -0.0054(4) 0.1289(17) Uani 0.50 1 d P . . 
Cl4 Cl -0.008(8) 0.499(7) 1.018(3) 0.186(8) Uani 0.50 1 d P . . 
C30 C 0.027(3) 0.6061(15) 1.0224(17) 0.149(10) Uani 0.50 1 d P . . 
 
loop_ 
 _atom_site_aniso_label 
 _atom_site_aniso_U_11 
 _atom_site_aniso_U_22 
 _atom_site_aniso_U_33 
 _atom_site_aniso_U_23 
 _atom_site_aniso_U_13 
 _atom_site_aniso_U_12 
S1 0.0458(7) 0.0423(7) 0.0450(7) -0.0141(6) -0.0030(6) -0.0049(5) 
S2 0.0659(9) 0.0375(7) 0.0557(8) -0.0155(6) -0.0003(7) -0.0138(6) 
S3 0.0498(8) 0.0442(7) 0.0524(8) -0.0077(6) -0.0148(6) -0.0049(6) 
S4 0.0687(9) 0.0415(7) 0.0494(8) -0.0052(6) -0.0130(7) -0.0176(6) 
S5 0.0513(8) 0.0621(9) 0.0495(8) -0.0198(7) -0.0037(6) 0.0107(6) 
S6 0.0806(11) 0.0564(9) 0.0600(9) -0.0105(7) -0.0316(8) 0.0194(8) 
N1 0.086(4) 0.086(4) 0.089(4) 0.009(3) 0.025(4) -0.006(3) 
N2 0.096(4) 0.074(4) 0.078(4) -0.026(3) -0.045(3) 0.004(3) 
C1 0.041(3) 0.031(2) 0.044(3) -0.009(2) -0.009(2) -0.005(2) 
C2 0.060(3) 0.040(3) 0.052(3) -0.019(2) -0.013(3) 0.002(2) 
C3 0.051(3) 0.037(3) 0.045(3) -0.012(2) -0.010(2) 0.007(2) 
C4 0.071(4) 0.070(4) 0.052(3) -0.023(3) -0.016(3) 0.005(3) 
C5 0.084(5) 0.071(4) 0.065(4) -0.017(3) -0.020(4) 0.010(3) 
C6 0.082(5) 0.080(4) 0.057(4) -0.017(3) -0.021(3) 0.012(4) 
C7 0.103(5) 0.073(4) 0.057(4) -0.014(3) -0.025(4) 0.022(4) 
C8 0.051(3) 0.038(3) 0.045(3) -0.010(2) -0.009(2) 0.007(2) 
C9 0.059(3) 0.036(3) 0.047(3) -0.007(2) -0.008(3) 0.007(2) 
C10 0.042(3) 0.035(2) 0.044(3) -0.015(2) -0.006(2) -0.001(2) 
C11 0.041(3) 0.034(2) 0.043(3) -0.013(2) -0.004(2) -0.003(2) 
C12 0.045(3) 0.035(2) 0.041(3) -0.007(2) -0.011(2) -0.002(2) 
C13 0.044(3) 0.039(3) 0.041(3) -0.010(2) -0.009(2) -0.003(2) 
C14 0.059(3) 0.038(3) 0.045(3) -0.006(2) -0.009(3) 0.000(2) 
C15 0.070(4) 0.045(3) 0.048(3) -0.003(2) -0.013(3) -0.012(3) 
C16 0.044(3) 0.062(3) 0.049(3) -0.003(3) -0.004(2) -0.005(3) 
C17 0.061(4) 0.055(4) 0.080(4) 0.000(3) 0.014(3) 0.010(3) 
C18 0.055(3) 0.042(3) 0.067(4) -0.001(3) 0.010(3) 0.002(2) 
C19 0.058(4) 0.068(4) 0.065(4) 0.001(3) 0.002(3) -0.008(3) 
C20 0.042(3) 0.032(2) 0.040(3) -0.010(2) -0.002(2) -0.004(2) 
C21 0.063(3) 0.038(3) 0.044(3) -0.010(2) -0.014(3) 0.003(2) 
C22 0.066(4) 0.041(3) 0.044(3) -0.014(2) -0.013(3) -0.007(2) 
C23 0.046(3) 0.049(3) 0.042(3) -0.011(2) -0.007(2) -0.006(2) 
C24 0.061(4) 0.044(3) 0.064(3) -0.011(3) -0.026(3) 0.008(3) 
C25 0.063(4) 0.035(3) 0.061(3) -0.019(2) -0.017(3) 0.002(2) 
C26 0.063(4) 0.052(3) 0.053(3) -0.018(3) -0.015(3) 0.003(3) 
C27 0.098(5) 0.051(3) 0.073(4) -0.028(3) -0.004(4) -0.011(3) 
C28 0.096(5) 0.046(3) 0.059(4) 0.004(3) -0.011(3) -0.010(3) 
Cl1 0.246(4) 0.1002(18) 0.138(2) -0.0200(17) -0.011(2) -0.061(2) 
Cl2A 0.171(7) 0.125(6) 0.232(9) 0.021(6) -0.092(7) -0.063(5) 
Cl2B 0.060(2) 0.075(3) 0.182(6) 0.016(3) -0.024(3) -0.019(2) 
C29 0.077(5) 0.093(6) 0.150(8) -0.002(5) -0.031(5) -0.015(4) 
Cl3 0.142(4) 0.135(4) 0.121(4) -0.021(3) -0.052(3) -0.010(3) 
Cl4 0.161(17) 0.220(12) 0.13(2) 0.05(3) -0.001(19) 0.055(11) 
C30 0.27(3) 0.056(10) 0.132(18) -0.018(11) -0.067(19) 0.012(15) 
 
_geom_special_details 
; 
 All esds (except the esd in the dihedral angle between two l.s. planes) 
 are estimated using the full covariance matrix.  The cell esds are taken 
 into account individually in the estimation of esds in distances, angles 
 and torsion angles; correlations between esds in cell parameters are only 
 used when they are defined by crystal symmetry.  An approximate (isotropic) 
 treatment of cell esds is used for estimating esds involving l.s. planes. 
; 
 
loop_ 
 _geom_bond_atom_site_label_1 
 _geom_bond_atom_site_label_2 
 _geom_bond_distance 
 _geom_bond_site_symmetry_2 
 _geom_bond_publ_flag 
S1 C1 1.741(5) . ? 
S1 C3 1.755(5) . ? 
S2 C2 1.745(5) . ? 
S2 C1 1.756(4) . ? 
S3 C8 1.749(5) . ? 
S3 C10 1.749(5) . ? 
S4 C9 1.746(5) . ? 
S4 C10 1.755(5) . ? 
S5 C3 1.755(5) . ? 
S5 C4 1.813(6) . ? 
S6 C8 1.752(5) . ? 
S6 C7 1.809(6) . ? 
N1 C19 1.130(7) 1_554 ? 
N2 C26 1.132(7) 1_554 ? 
C1 C12 1.365(6) . ? 
C2 C3 1.324(7) . ? 
C2 C27 1.513(7) . ? 
C4 C5 1.485(8) . ? 
C5 C6 1.495(8) . ? 
C6 C7 1.545(9) . ? 
C8 C9 1.334(7) . ? 
C9 C28 1.493(7) . ? 
C10 C11 1.363(6) . ? 
C11 C20 1.465(6) . ? 
C11 C12 1.497(6) . ? 
C12 C13 1.462(7) . ? 
C13 C14 1.387(6) . ? 
C13 C18 1.397(7) . ? 
C14 C15 1.376(7) . ? 
C15 C16 1.379(7) . ? 
C16 C17 1.374(8) . ? 
C16 C19 1.439(8) . ? 
C17 C18 1.372(7) . ? 
C19 N1 1.130(7) 1_556 ? 
C20 C21 1.399(6) . ? 
C20 C25 1.399(7) . ? 
C21 C22 1.373(7) . ? 
C22 C23 1.384(7) . ? 
C23 C24 1.398(7) . ? 
C23 C26 1.441(7) . ? 
C24 C25 1.369(7) . ? 
C26 N2 1.132(7) 1_556 ? 
Cl1 C29 1.762(10) . ? 
Cl2A Cl2B 1.067(9) . ? 
Cl2A C29 1.810(12) . ? 
Cl2B C29 1.757(9) . ? 
Cl3 C30 1.52(2) 1_554 ? 
Cl4 Cl4 0.48(7) 2_567 ? 
Cl4 C30 1.43(11) . ? 
Cl4 C30 1.55(10) 2_567 ? 
C30 Cl3 1.52(2) 1_556 ? 
C30 Cl4 1.55(10) 2_567 ? 
 
loop_ 
 _geom_angle_atom_site_label_1 
 _geom_angle_atom_site_label_2 
 _geom_angle_atom_site_label_3 
 _geom_angle 
 _geom_angle_site_symmetry_1 
 _geom_angle_site_symmetry_3 
 _geom_angle_publ_flag 
C1 S1 C3 96.6(2) . . ? 
C2 S2 C1 97.0(2) . . ? 
C8 S3 C10 96.5(2) . . ? 
C9 S4 C10 96.8(2) . . ? 
C3 S5 C4 102.9(3) . . ? 
C8 S6 C7 102.6(3) . . ? 
C12 C1 S1 122.2(4) . . ? 
C12 C1 S2 125.2(4) . . ? 
S1 C1 S2 112.4(3) . . ? 
C3 C2 C27 127.4(5) . . ? 
C3 C2 S2 116.5(4) . . ? 
C27 C2 S2 116.1(4) . . ? 
C2 C3 S1 117.2(4) . . ? 
C2 C3 S5 125.9(4) . . ? 
S1 C3 S5 116.8(3) . . ? 
C5 C4 S5 116.1(4) . . ? 
C4 C5 C6 114.0(5) . . ? 
C5 C6 C7 113.3(5) . . ? 
C6 C7 S6 115.5(5) . . ? 
C9 C8 S3 117.1(4) . . ? 
C9 C8 S6 125.6(4) . . ? 
S3 C8 S6 117.3(3) . . ? 
C8 C9 C28 128.0(5) . . ? 
C8 C9 S4 116.3(4) . . ? 
C28 C9 S4 115.7(4) . . ? 
C11 C10 S3 122.8(4) . . ? 
C11 C10 S4 125.2(4) . . ? 
S3 C10 S4 111.9(3) . . ? 
C10 C11 C20 123.0(4) . . ? 
C10 C11 C12 119.0(4) . . ? 
C20 C11 C12 118.1(4) . . ? 
C1 C12 C13 123.1(4) . . ? 
C1 C12 C11 118.7(4) . . ? 
C13 C12 C11 118.1(4) . . ? 
C14 C13 C18 116.9(5) . . ? 
C14 C13 C12 124.1(4) . . ? 
C18 C13 C12 119.0(4) . . ? 
C15 C14 C13 121.8(5) . . ? 
C14 C15 C16 119.8(5) . . ? 
C17 C16 C15 119.8(5) . . ? 
C17 C16 C19 120.8(5) . . ? 
C15 C16 C19 119.4(5) . . ? 
C18 C17 C16 120.1(5) . . ? 
C17 C18 C13 121.6(5) . . ? 
N1 C19 C16 179.6(8) 1_556 . ? 
C21 C20 C25 117.0(4) . . ? 
C21 C20 C11 122.9(4) . . ? 
C25 C20 C11 120.0(4) . . ? 
C22 C21 C20 121.6(5) . . ? 
C21 C22 C23 120.1(5) . . ? 
C22 C23 C24 119.5(5) . . ? 
C22 C23 C26 120.8(5) . . ? 
C24 C23 C26 119.6(5) . . ? 
C25 C24 C23 119.7(5) . . ? 
C24 C25 C20 122.0(4) . . ? 
N2 C26 C23 179.1(7) 1_556 . ? 
Cl2B Cl2A C29 69.9(7) . . ? 
Cl2A Cl2B C29 75.3(7) . . ? 
Cl2B C29 Cl1 97.7(5) . . ? 
Cl2B C29 Cl2A 34.8(3) . . ? 
Cl1 C29 Cl2A 129.4(6) . . ? 
Cl4 Cl4 C30 95(10) 2_567 . ? 
Cl4 Cl4 C30 67(10) 2_567 2_567 ? 
C30 Cl4 C30 162(3) . 2_567 ? 
Cl4 C30 Cl3 125(3) . 1_556 ? 
Cl4 C30 Cl4 18(3) . 2_567 ? 
Cl3 C30 Cl4 120(3) 1_556 2_567 ? 
 
_diffrn_measured_fraction_theta_max    0.998 
_diffrn_reflns_theta_full              26.97 
_diffrn_measured_fraction_theta_full   0.998 
_refine_diff_density_max    1.031 
_refine_diff_density_min   -0.848 
_refine_diff_density_rms    0.074 
#===END


data_2b(4)
 
_publ_requested_journal           'Chemistry'
_publ_requested_category          FM

_audit_creation_method            SHELXL-97 
_chemical_name_systematic 
; 
 ?
; 
_chemical_name_common             '(C28H22N2S6).(MeCN)'  
_chemical_melting_point           ? 
_chemical_formula_moiety          'C28 H22 N2 S6 , C2 H3 N' 
_chemical_formula_structural      '(C28H22N2S6) (CH3CN)'  
_chemical_formula_sum             'C30 H25 N3 S6' 
_chemical_formula_weight          619.89 
 
loop_ 
 _atom_type_symbol 
 _atom_type_description 
 _atom_type_scat_dispersion_real 
 _atom_type_scat_dispersion_imag 
 _atom_type_scat_source 
 'C'  'C'   0.0033   0.0016 
 'International Tables Vol C Tables 4.2.6.8 and 6.1.1.4' 
 'H'  'H'   0.0000   0.0000 
 'International Tables Vol C Tables 4.2.6.8 and 6.1.1.4' 
 'N'  'N'   0.0061   0.0033 
 'International Tables Vol C Tables 4.2.6.8 and 6.1.1.4' 
 'S'  'S'   0.1246   0.1234 
 'International Tables Vol C Tables 4.2.6.8 and 6.1.1.4' 
 
_symmetry_cell_setting            monoclinic 
_symmetry_space_group_name_H-M    'P 21/n' 
 
loop_ 
 _symmetry_equiv_pos_as_xyz 
 'x, y, z' 
 'x+1/2, -y+1/2, z+1/2' 
 '-x, -y, -z' 
 '-x-1/2, y-1/2, -z-1/2' 
 
_cell_length_a                    12.8332(10) 
_cell_length_b                    10.1122(11) 
_cell_length_c                    24.0994(18) 
_cell_angle_alpha                 90.00 
_cell_angle_beta                  100.699(9) 
_cell_angle_gamma                 90.00 
_cell_volume                      3073.1(5) 
_cell_formula_units_Z             4 
_cell_measurement_temperature     298(2) 
_cell_measurement_reflns_used     8000 
_cell_measurement_theta_min       1.65 
_cell_measurement_theta_max       26.05 
 
_exptl_crystal_description        polyhedral 
_exptl_crystal_colour             orange 
_exptl_crystal_size_max           0.6 
_exptl_crystal_size_mid           0.4 
_exptl_crystal_size_min           0.4 
_exptl_crystal_density_meas       'not measured' 
_exptl_crystal_density_diffrn     1.340 
_exptl_crystal_density_method     'not measured' 
_exptl_crystal_F_000              1288 
_exptl_absorpt_coefficient_mu     0.470 
_exptl_absorpt_correction_type    numerical 
_exptl_absorpt_correction_T_min   0.6655 
_exptl_absorpt_correction_T_max   0.7953 
_exptl_absorpt_process_details    'FACEIT (Stoe IPDS)' 
 
_exptl_special_details 
; 
 ? 
; 
  
_diffrn_ambient_temperature       298(2) 
_diffrn_radiation_wavelength      0.71073 
_diffrn_radiation_type            MoK\a 
_diffrn_radiation_source          'fine-focus sealed tube' 
_diffrn_radiation_monochromator   graphite 
_diffrn_radiation_detector	    'area detector' 
_diffrn_measurement_device_type   'Stoe IPDS'
_diffrn_measurement_method        'Rotation, \D\f=1.%'
_diffrn_detector_area_resol_mean  6.66
_diffrn_standards_decay_%         0
_diffrn_reflns_number             25839 
_diffrn_reflns_av_R_equivalents   0.0437 
_diffrn_reflns_av_sigmaI/netI     0.0266 
_diffrn_reflns_limit_h_min        -15 
_diffrn_reflns_limit_h_max        15 
_diffrn_reflns_limit_k_min        -12 
_diffrn_reflns_limit_k_max        12 
_diffrn_reflns_limit_l_min        -29 
_diffrn_reflns_limit_l_max        29 
_diffrn_reflns_theta_min          2.19 
_diffrn_reflns_theta_max          25.93 
_reflns_number_total              5669 
_reflns_number_gt                 4658 
_reflns_threshold_expression      >2sigma(I) 
 
_computing_data_collection        'EXPOSE (Stoe IPDS)'
_computing_cell_refinement        'SELECT (Stoe IPDS)'
_computing_data_reduction         'INTEGRATE (Stoe IPDS)'
_computing_structure_solution     'SHELXS-97 (Sheldrick, 1990)' 
_computing_structure_refinement   'SHELXL-97 (Sheldrick, 1997)' 
_computing_molecular_graphics     'DIAMOND (Brandenburg, 1999)'
_computing_publication_material   'SHELXL-97 (Sheldrick, 1997)'
 
_refine_special_details 
; 
 Refinement of F^2^ against ALL reflections.  The weighted R-factor wR and 
 goodness of fit S are based on F^2^, conventional R-factors R are based 
 on F, with F set to zero for negative F^2^. The threshold expression of 
 F^2^ > 2sigma(F^2^) is used only for calculating R-factors(gt) etc. and is 
 not relevant to the choice of reflections for refinement.  R-factors based 
 on F^2^ are statistically about twice as large as those based on F, and R- 
 factors based on ALL data will be even larger. 
; 
 
_refine_ls_structure_factor_coef  Fsqd  
_refine_ls_matrix_type            full 
_refine_ls_weighting_scheme       calc  
_refine_ls_weighting_details 
 'calc w=1/[\s^2^(Fo^2^)+(0.0759P)^2^+0.1137P] where P=(Fo^2^+2Fc^2^)/3' 
_atom_sites_solution_primary      direct 
_atom_sites_solution_secondary    difmap 
_atom_sites_solution_hydrogens    geom 
_refine_ls_hydrogen_treatment     mixed 
_refine_ls_extinction_method      none 
_refine_ls_extinction_coef        ? 
_refine_ls_number_reflns          5669 
_refine_ls_number_parameters      370 
_refine_ls_number_restraints      2 
_refine_ls_R_factor_all           0.0460 
_refine_ls_R_factor_gt            0.0379 
_refine_ls_wR_factor_ref          0.1108 
_refine_ls_wR_factor_gt           0.1065 
_refine_ls_goodness_of_fit_ref    1.045 
_refine_ls_restrained_S_all       1.050 
_refine_ls_shift/su_max           0.001 
_refine_ls_shift/su_mean          0.000 
 
loop_ 
 _atom_site_label 
 _atom_site_type_symbol 
 _atom_site_fract_x 
 _atom_site_fract_y 
 _atom_site_fract_z 
 _atom_site_U_iso_or_equiv 
 _atom_site_adp_type 
 _atom_site_occupancy 
 _atom_site_symetry_multiplicity 
 _atom_site_calc_flag 
 _atom_site_refinement_flags 
 _atom_site_disorder_assembly 
 _atom_site_disorder_group 
S1 S 0.30630(4) 0.09369(5) 0.23169(2) 0.05041(14) Uani 1 1 d . . . 
S2 S 0.15643(4) 0.26325(5) 0.15829(2) 0.04811(14) Uani 1 1 d . . . 
S3 S 0.17699(5) 0.08727(6) 0.32376(2) 0.05856(16) Uani 1 1 d . . . 
S4 S 0.65753(5) 0.12055(7) 0.22618(2) 0.06708(18) Uani 1 1 d . . . 
S5 S 0.51144(5) 0.33571(6) 0.23877(2) 0.05971(16) Uani 1 1 d . . . 
S6 S 0.63337(5) 0.42186(7) 0.35134(3) 0.0737(2) Uani 1 1 d . . . 
N1 N 0.1447(2) 0.0445(2) 0.03480(10) 0.0807(6) Uani 1 1 d . . . 
N2 N 0.6782(2) 0.2685(3) 0.08692(13) 0.0980(8) Uani 1 1 d . . . 
C1 C 0.28341(15) 0.19191(17) 0.17055(7) 0.0400(4) Uani 1 1 d . . . 
C2 C 0.35751(14) 0.21000(16) 0.13830(7) 0.0388(4) Uani 1 1 d . . . 
C3 C 0.46563(15) 0.15205(17) 0.15444(7) 0.0414(4) Uani 1 1 d . . . 
C4 C 0.53523(15) 0.19607(19) 0.19960(8) 0.0475(4) Uani 1 1 d . . . 
C5 C 0.19290(16) 0.14547(18) 0.25716(8) 0.0454(4) Uani 1 1 d . . . 
C6 C 0.12366(16) 0.22203(18) 0.22375(8) 0.0470(4) Uani 1 1 d . . . 
C7 C 0.68742(18) 0.2142(3) 0.28861(9) 0.0644(6) Uani 1 1 d . . . 
C8 C 0.62005(18) 0.3118(2) 0.29397(9) 0.0590(5) Uani 1 1 d . . . 
C9 C 0.02034(19) 0.2750(3) 0.23491(11) 0.0683(6) Uani 1 1 d . . . 
H9A H -0.0131 0.3271 0.2033 0.102 Uiso 1 1 calc R . . 
H9B H 0.0332 0.3291 0.2682 0.102 Uiso 1 1 calc R . . 
H9C H -0.0252 0.2027 0.2404 0.102 Uiso 1 1 calc R . . 
C10 C 0.7846(2) 0.1717(4) 0.32944(12) 0.0991(11) Uani 1 1 d . . . 
H10A H 0.8167 0.0978 0.3141 0.149 Uiso 1 1 calc R . . 
H10B H 0.7651 0.1464 0.3645 0.149 Uiso 1 1 calc R . . 
H10C H 0.8342 0.2437 0.3358 0.149 Uiso 1 1 calc R . . 
C11 C 0.3064(2) 0.1222(2) 0.36564(9) 0.0596(5) Uani 1 1 d . . . 
H11A H 0.3060 0.0970 0.4044 0.072 Uiso 1 1 calc R . . 
H11B H 0.3583 0.0670 0.3521 0.072 Uiso 1 1 calc R . . 
C12 C 0.34228(18) 0.2656(2) 0.36492(10) 0.0569(5) Uani 1 1 d . . . 
H12A H 0.3122 0.3155 0.3925 0.068 Uiso 1 1 calc R . . 
H12B H 0.3156 0.3033 0.3280 0.068 Uiso 1 1 calc R . . 
C13 C 0.46216(19) 0.2786(2) 0.37805(10) 0.0602(5) Uani 1 1 d . . . 
H13A H 0.4874 0.2564 0.4174 0.072 Uiso 1 1 calc R . . 
H13B H 0.4927 0.2156 0.3552 0.072 Uiso 1 1 calc R . . 
C14 C 0.4999(2) 0.4157(2) 0.36695(11) 0.0646(6) Uani 1 1 d . . . 
H14A H 0.4977 0.4704 0.3998 0.078 Uiso 1 1 calc R . . 
H14B H 0.4511 0.4536 0.3354 0.078 Uiso 1 1 calc R . . 
C15 C 0.33614(14) 0.28775(16) 0.08488(7) 0.0400(4) Uani 1 1 d . . . 
C16 C 0.40200(18) 0.39522(17) 0.07858(9) 0.0502(5) Uani 1 1 d . . . 
H16 H 0.4595 0.4145 0.1070 0.060 Uiso 1 1 calc R . . 
C17 C 0.3822(2) 0.47296(19) 0.03046(10) 0.0622(6) Uani 1 1 d . . . 
H17 H 0.4263 0.5444 0.0272 0.075 Uiso 1 1 calc R . . 
C18 C 0.2990(2) 0.4464(2) -0.01221(10) 0.0666(7) Uani 1 1 d . . . 
H18 H 0.2855 0.5012 -0.0437 0.080 Uiso 1 1 calc R . . 
C19 C 0.2357(2) 0.3394(2) -0.00875(9) 0.0601(5) Uani 1 1 d . . . 
H19 H 0.1802 0.3200 -0.0383 0.072 Uiso 1 1 calc R . . 
C20 C 0.25491(16) 0.25862(18) 0.03970(8) 0.0452(4) Uani 1 1 d . . . 
C21 C 0.19302(18) 0.1406(2) 0.03872(9) 0.0559(5) Uani 1 1 d . . . 
C22 C 0.49215(15) 0.04297(17) 0.11851(7) 0.0422(4) Uani 1 1 d . . . 
C23 C 0.43073(19) -0.0708(2) 0.11177(10) 0.0567(5) Uani 1 1 d . . . 
H23 H 0.3741 -0.0786 0.1307 0.068 Uiso 1 1 calc R . . 
C24 C 0.4521(2) -0.1728(2) 0.07745(11) 0.0695(6) Uani 1 1 d . . . 
H24 H 0.4096 -0.2479 0.0733 0.083 Uiso 1 1 calc R . . 
C25 C 0.5355(2) -0.1642(2) 0.04943(10) 0.0651(6) Uani 1 1 d . . . 
H25 H 0.5500 -0.2340 0.0269 0.078 Uiso 1 1 calc R . . 
C26 C 0.59752(18) -0.0530(2) 0.05444(8) 0.0578(5) Uani 1 1 d . . . 
H26 H 0.6539 -0.0471 0.0353 0.069 Uiso 1 1 calc R . . 
C27 C 0.57565(16) 0.05151(19) 0.08851(8) 0.0470(4) Uani 1 1 d . . . 
C28 C 0.63438(19) 0.1724(2) 0.08899(10) 0.0621(6) Uani 1 1 d . . . 
C1AS C 0.9051(3) 0.2569(5) 0.03789(18) 0.1175(13) Uani 0.50 1 d P A 1 
HAS1 H 0.9314 0.1777 0.0576 0.176 Uiso 0.50 1 calc PR A 1 
HAS2 H 0.9441 0.2738 0.0083 0.176 Uiso 0.50 1 calc PR A 1 
HAS3 H 0.8313 0.2460 0.0219 0.176 Uiso 0.50 1 calc PR A 1 
C2AS C 0.9189(5) 0.3763(7) 0.0801(4) 0.0884(18) Uani 0.50 1 d P A 1 
N1AS N 0.9273(6) 0.4580(6) 0.1143(3) 0.120(2) Uani 0.50 1 d P A 1 
C1BS C 0.9051(3) 0.2569(5) 0.03789(18) 0.1175(13) Uani 0.50 1 d PD B 2 
HBS1 H 0.9101 0.2322 0.0768 0.176 Uiso 0.50 1 calc PR B 2 
HBS2 H 0.9358 0.1887 0.0183 0.176 Uiso 0.50 1 calc PR B 2 
HBS3 H 0.8319 0.2682 0.0208 0.176 Uiso 0.50 1 calc PR B 2 
C2BS C 0.9558(6) 0.3672(8) 0.0349(3) 0.0927(18) Uani 0.50 1 d PD B 2 
N1BS N 0.9940(8) 0.4664(8) 0.0353(5) 0.172(4) Uani 0.50 1 d PD . 2 
 
loop_ 
 _atom_site_aniso_label 
 _atom_site_aniso_U_11 
 _atom_site_aniso_U_22 
 _atom_site_aniso_U_33 
 _atom_site_aniso_U_23 
 _atom_site_aniso_U_13 
 _atom_site_aniso_U_12 
S1 0.0543(3) 0.0546(3) 0.0448(3) 0.00931(19) 0.0158(2) 0.0122(2) 
S2 0.0423(3) 0.0550(3) 0.0491(3) 0.0082(2) 0.0139(2) 0.00911(19) 
S3 0.0640(4) 0.0683(3) 0.0468(3) 0.0040(2) 0.0193(3) -0.0172(2) 
S4 0.0497(3) 0.0946(4) 0.0535(3) -0.0143(3) 0.0004(3) 0.0222(3) 
S5 0.0553(3) 0.0650(3) 0.0554(3) -0.0188(2) 0.0013(3) 0.0060(2) 
S6 0.0629(4) 0.0937(4) 0.0644(4) -0.0321(3) 0.0114(3) -0.0269(3) 
N1 0.0818(16) 0.0852(15) 0.0741(13) -0.0084(11) 0.0117(12) -0.0310(13) 
N2 0.0965(19) 0.0839(16) 0.126(2) 0.0071(14) 0.0519(18) -0.0181(14) 
C1 0.0412(10) 0.0402(8) 0.0386(8) -0.0008(6) 0.0074(8) 0.0037(7) 
C2 0.0386(9) 0.0408(8) 0.0373(8) -0.0036(6) 0.0077(8) 0.0013(7) 
C3 0.0405(10) 0.0462(9) 0.0388(9) -0.0019(7) 0.0107(8) 0.0035(7) 
C4 0.0433(11) 0.0555(10) 0.0443(10) -0.0052(8) 0.0098(9) 0.0049(8) 
C5 0.0474(11) 0.0478(9) 0.0435(9) -0.0011(7) 0.0148(9) -0.0061(8) 
C6 0.0450(11) 0.0493(10) 0.0501(10) -0.0041(8) 0.0180(9) -0.0044(8) 
C7 0.0426(12) 0.1000(17) 0.0486(11) -0.0098(11) 0.0033(11) 0.0009(11) 
C8 0.0457(12) 0.0805(14) 0.0507(11) -0.0155(10) 0.0084(10) -0.0111(10) 
C9 0.0509(13) 0.0897(17) 0.0700(14) 0.0009(12) 0.0262(12) 0.0094(11) 
C10 0.0547(17) 0.174(3) 0.0612(15) -0.0196(18) -0.0092(15) 0.0170(18) 
C11 0.0683(15) 0.0619(12) 0.0472(11) 0.0042(9) 0.0070(11) -0.0056(10) 
C12 0.0582(13) 0.0535(11) 0.0584(12) -0.0092(9) 0.0097(11) 0.0003(9) 
C13 0.0572(13) 0.0641(13) 0.0597(12) -0.0030(10) 0.0119(11) 0.0033(10) 
C14 0.0660(15) 0.0629(13) 0.0671(13) -0.0213(10) 0.0180(12) -0.0065(10) 
C15 0.0424(10) 0.0385(8) 0.0418(9) -0.0031(7) 0.0146(8) 0.0040(7) 
C16 0.0581(12) 0.0430(9) 0.0551(11) -0.0084(8) 0.0250(10) -0.0044(8) 
C17 0.0849(17) 0.0381(10) 0.0749(14) -0.0014(9) 0.0438(14) -0.0013(9) 
C18 0.0896(19) 0.0543(12) 0.0631(14) 0.0178(10) 0.0332(14) 0.0187(11) 
C19 0.0612(14) 0.0699(13) 0.0482(11) 0.0090(9) 0.0078(11) 0.0138(10) 
C20 0.0456(11) 0.0492(10) 0.0420(9) 0.0013(7) 0.0112(9) 0.0040(8) 
C21 0.0547(13) 0.0670(13) 0.0452(10) -0.0016(9) 0.0074(10) -0.0058(10) 
C22 0.0409(10) 0.0479(9) 0.0377(9) -0.0003(7) 0.0076(8) 0.0076(7) 
C23 0.0584(13) 0.0519(11) 0.0625(12) -0.0081(9) 0.0184(11) -0.0037(9) 
C24 0.0778(17) 0.0508(12) 0.0796(16) -0.0147(11) 0.0143(14) -0.0011(11) 
C25 0.0809(17) 0.0567(13) 0.0573(12) -0.0134(9) 0.0115(12) 0.0191(11) 
C26 0.0580(13) 0.0716(14) 0.0463(10) -0.0005(9) 0.0162(10) 0.0222(10) 
C27 0.0466(11) 0.0538(10) 0.0421(9) 0.0035(7) 0.0122(9) 0.0098(8) 
C28 0.0593(14) 0.0692(14) 0.0647(13) 0.0048(10) 0.0293(12) 0.0015(11) 
C1AS 0.097(3) 0.140(4) 0.118(3) 0.002(3) 0.027(3) 0.014(2) 
C2AS 0.055(3) 0.088(4) 0.113(5) 0.027(4) -0.011(4) 0.006(3) 
N1AS 0.108(5) 0.092(4) 0.145(6) 0.012(4) -0.015(4) -0.009(3) 
C1BS 0.097(3) 0.140(4) 0.118(3) 0.002(3) 0.027(3) 0.014(2) 
C2BS 0.078(4) 0.097(5) 0.099(5) -0.005(4) 0.005(4) 0.022(4) 
N1BS 0.148(7) 0.094(5) 0.256(12) 0.009(6) -0.011(8) -0.009(5) 
 
_geom_special_details 
; 
 All esds (except the esd in the dihedral angle between two l.s. planes) 
 are estimated using the full covariance matrix.  The cell esds are taken 
 into account individually in the estimation of esds in distances, angles 
 and torsion angles; correlations between esds in cell parameters are only 
 used when they are defined by crystal symmetry.  An approximate (isotropic) 
 treatment of cell esds is used for estimating esds involving l.s. planes. 
; 
 
loop_ 
 _geom_bond_atom_site_label_1 
 _geom_bond_atom_site_label_2 
 _geom_bond_distance 
 _geom_bond_site_symmetry_2 
 _geom_bond_publ_flag 
S1 C1 1.7560(18) . ? 
S1 C5 1.7607(19) . ? 
S2 C6 1.7565(18) . ? 
S2 C1 1.7563(18) . ? 
S3 C5 1.7567(18) . ? 
S3 C11 1.811(3) . ? 
S4 C4 1.756(2) . ? 
S4 C7 1.759(2) . ? 
S5 C4 1.7566(19) . ? 
S5 C8 1.756(2) . ? 
S6 C8 1.759(2) . ? 
S6 C14 1.822(2) . ? 
N1 C21 1.147(3) . ? 
N2 C28 1.128(3) . ? 
C1 C2 1.348(2) . ? 
C2 C3 1.490(3) . ? 
C2 C15 1.490(2) . ? 
C3 C4 1.349(3) . ? 
C3 C22 1.480(2) . ? 
C5 C6 1.331(3) . ? 
C6 C9 1.500(3) . ? 
C7 C8 1.334(3) . ? 
C7 C10 1.501(4) . ? 
C9 H9A 0.9600 . ? 
C9 H9B 0.9600 . ? 
C9 H9C 0.9600 . ? 
C10 H10A 0.9600 . ? 
C10 H10B 0.9600 . ? 
C10 H10C 0.9600 . ? 
C11 C12 1.522(3) . ? 
C11 H11A 0.9700 . ? 
C11 H11B 0.9700 . ? 
C12 C13 1.518(3) . ? 
C12 H12A 0.9700 . ? 
C12 H12B 0.9700 . ? 
C13 C14 1.509(3) . ? 
C13 H13A 0.9700 . ? 
C13 H13B 0.9700 . ? 
C14 H14A 0.9700 . ? 
C14 H14B 0.9700 . ? 
C15 C20 1.392(3) . ? 
C15 C16 1.402(3) . ? 
C16 C17 1.385(3) . ? 
C16 H16 0.9300 . ? 
C17 C18 1.364(4) . ? 
C17 H17 0.9300 . ? 
C18 C19 1.364(4) . ? 
C18 H18 0.9300 . ? 
C19 C20 1.409(3) . ? 
C19 H19 0.9300 . ? 
C20 C21 1.431(3) . ? 
C22 C27 1.402(2) . ? 
C22 C23 1.387(3) . ? 
C23 C24 1.381(3) . ? 
C23 H23 0.9300 . ? 
C24 C25 1.369(4) . ? 
C24 H24 0.9300 . ? 
C25 C26 1.370(3) . ? 
C25 H25 0.9300 . ? 
C26 C27 1.398(3) . ? 
C26 H26 0.9300 . ? 
C27 C28 1.435(3) . ? 
C1AS C2AS 1.568(10) . ? 
C1AS HAS1 0.9600 . ? 
C1AS HAS2 0.9600 . ? 
C1AS HAS3 0.9600 . ? 
C2AS N1AS 1.157(9) . ? 
C2BS N1BS 1.116(9) . ? 
N1BS N1BS 1.86(2) 3_765 ? 
 
loop_ 
 _geom_angle_atom_site_label_1 
 _geom_angle_atom_site_label_2 
 _geom_angle_atom_site_label_3 
 _geom_angle 
 _geom_angle_site_symmetry_1 
 _geom_angle_site_symmetry_3 
 _geom_angle_publ_flag 
C1 S1 C5 95.97(9) . . ? 
C6 S2 C1 96.95(9) . . ? 
C5 S3 C11 101.17(10) . . ? 
C4 S4 C7 96.68(10) . . ? 
C4 S5 C8 95.95(10) . . ? 
C8 S6 C14 100.53(10) . . ? 
C2 C1 S1 122.33(14) . . ? 
C2 C1 S2 125.40(14) . . ? 
S1 C1 S2 112.26(9) . . ? 
C1 C2 C3 121.25(16) . . ? 
C1 C2 C15 122.25(16) . . ? 
C3 C2 C15 116.51(14) . . ? 
C4 C3 C22 121.88(17) . . ? 
C4 C3 C2 121.74(15) . . ? 
C22 C3 C2 116.38(15) . . ? 
C3 C4 S5 122.94(15) . . ? 
C3 C4 S4 124.33(14) . . ? 
S5 C4 S4 112.72(11) . . ? 
C6 C5 S3 124.73(14) . . ? 
C6 C5 S1 117.67(13) . . ? 
S3 C5 S1 117.55(12) . . ? 
C5 C6 C9 127.76(18) . . ? 
C5 C6 S2 115.91(14) . . ? 
C9 C6 S2 116.32(17) . . ? 
C8 C7 C10 128.5(2) . . ? 
C8 C7 S4 116.02(19) . . ? 
C10 C7 S4 115.4(2) . . ? 
C7 C8 S6 125.0(2) . . ? 
C7 C8 S5 117.80(17) . . ? 
S6 C8 S5 117.13(14) . . ? 
C6 C9 H9A 109.5 . . ? 
C6 C9 H9B 109.5 . . ? 
H9A C9 H9B 109.5 . . ? 
C6 C9 H9C 109.5 . . ? 
H9A C9 H9C 109.5 . . ? 
H9B C9 H9C 109.5 . . ? 
C7 C10 H10A 109.5 . . ? 
C7 C10 H10B 109.5 . . ? 
H10A C10 H10B 109.5 . . ? 
C7 C10 H10C 109.5 . . ? 
H10A C10 H10C 109.5 . . ? 
H10B C10 H10C 109.5 . . ? 
C12 C11 S3 115.28(17) . . ? 
C12 C11 H11A 108.5 . . ? 
S3 C11 H11A 108.5 . . ? 
C12 C11 H11B 108.5 . . ? 
S3 C11 H11B 108.5 . . ? 
H11A C11 H11B 107.5 . . ? 
C11 C12 C13 112.14(19) . . ? 
C11 C12 H12A 109.2 . . ? 
C13 C12 H12A 109.2 . . ? 
C11 C12 H12B 109.2 . . ? 
C13 C12 H12B 109.2 . . ? 
H12A C12 H12B 107.9 . . ? 
C14 C13 C12 112.9(2) . . ? 
C14 C13 H13A 109.0 . . ? 
C12 C13 H13A 109.0 . . ? 
C14 C13 H13B 109.0 . . ? 
C12 C13 H13B 109.0 . . ? 
H13A C13 H13B 107.8 . . ? 
C13 C14 S6 114.40(16) . . ? 
C13 C14 H14A 108.7 . . ? 
S6 C14 H14A 108.7 . . ? 
C13 C14 H14B 108.7 . . ? 
S6 C14 H14B 108.7 . . ? 
H14A C14 H14B 107.6 . . ? 
C20 C15 C16 117.28(17) . . ? 
C20 C15 C2 123.72(16) . . ? 
C16 C15 C2 118.98(18) . . ? 
C15 C16 C17 120.7(2) . . ? 
C15 C16 H16 119.7 . . ? 
C17 C16 H16 119.7 . . ? 
C18 C17 C16 121.0(2) . . ? 
C18 C17 H17 119.5 . . ? 
C16 C17 H17 119.5 . . ? 
C19 C18 C17 120.1(2) . . ? 
C19 C18 H18 120.0 . . ? 
C17 C18 H18 120.0 . . ? 
C18 C19 C20 119.8(2) . . ? 
C18 C19 H19 120.1 . . ? 
C20 C19 H19 120.1 . . ? 
C15 C20 C19 121.03(19) . . ? 
C15 C20 C21 121.48(17) . . ? 
C19 C20 C21 117.3(2) . . ? 
N1 C21 C20 175.9(2) . . ? 
C27 C22 C23 117.57(17) . . ? 
C27 C22 C3 122.43(17) . . ? 
C23 C22 C3 119.95(16) . . ? 
C24 C23 C22 121.2(2) . . ? 
C24 C23 H23 119.4 . . ? 
C22 C23 H23 119.4 . . ? 
C23 C24 C25 120.5(2) . . ? 
C23 C24 H24 119.7 . . ? 
C25 C24 H24 119.7 . . ? 
C26 C25 C24 120.20(19) . . ? 
C26 C25 H25 119.9 . . ? 
C24 C25 H25 119.9 . . ? 
C25 C26 C27 119.68(19) . . ? 
C25 C26 H26 120.2 . . ? 
C27 C26 H26 120.2 . . ? 
C26 C27 C22 120.80(19) . . ? 
C26 C27 C28 119.09(17) . . ? 
C22 C27 C28 119.92(17) . . ? 
N2 C28 C27 176.9(3) . . ? 
C2AS C1AS HAS1 109.5 . . ? 
C2AS C1AS HAS2 109.5 . . ? 
HAS1 C1AS HAS2 109.5 . . ? 
C2AS C1AS HAS3 109.5 . . ? 
HAS1 C1AS HAS3 109.5 . . ? 
HAS2 C1AS HAS3 109.5 . . ? 
N1AS C2AS C1AS 174.9(7) . . ? 
C2BS N1BS N1BS 115.4(11) . 3_765 ? 
 
_diffrn_measured_fraction_theta_max    0.945 
_diffrn_reflns_theta_full              25.93 
_diffrn_measured_fraction_theta_full   0.945 
_refine_diff_density_max    0.345 
_refine_diff_density_min   -0.262 
_refine_diff_density_rms    0.050 

#===END

data_2a(3)
 
_publ_requested_journal           'Chemistry'
_publ_requested_category          FM

_audit_creation_method            SHELXL-97 
_chemical_name_systematic 
; 
 ?
; 
_chemical_name_common             '(C27H20N2S6).(CH2CL2)0.5' 
_chemical_formula_moiety          'C27 H20 N2 S6 , 0.5(C H2 CL2)' 
_chemical_formula_sum             'C55 H42 Cl2 N4 S12' 
_chemical_formula_weight          1214.55 
 
loop_ 
 _atom_type_symbol 
 _atom_type_description 
 _atom_type_scat_dispersion_real 
 _atom_type_scat_dispersion_imag 
 _atom_type_scat_source 
 'C'  'C'   0.0033   0.0016 
 'International Tables Vol C Tables 4.2.6.8 and 6.1.1.4' 
 'H'  'H'   0.0000   0.0000 
 'International Tables Vol C Tables 4.2.6.8 and 6.1.1.4' 
 'N'  'N'   0.0061   0.0033 
 'International Tables Vol C Tables 4.2.6.8 and 6.1.1.4' 
 'S'  'S'   0.1246   0.1234 
 'International Tables Vol C Tables 4.2.6.8 and 6.1.1.4' 
 'Cl'  'Cl'   0.1484   0.1585 
 'International Tables Vol C Tables 4.2.6.8 and 6.1.1.4' 
 
_symmetry_cell_setting            monoclinic 
_symmetry_space_group_name_H-M    'P 21/c' 
 
loop_ 
 _symmetry_equiv_pos_as_xyz 
 'x, y, z' 
 '-x, y+1/2, -z+1/2' 
 '-x, -y, -z' 
 'x, -y-1/2, z-1/2' 
 
_cell_length_a                    11.3213(10) 
_cell_length_b                    12.8455(9) 
_cell_length_c                    20.754(2) 
_cell_angle_alpha                 90.00 
_cell_angle_beta                  90.790(8) 
_cell_angle_gamma                 90.00 
_cell_volume                      3018.0(4) 
_cell_formula_units_Z             2 
_cell_measurement_temperature     293(2) 
_cell_measurement_reflns_used     2000 
_cell_measurement_theta_min       1.86 
_cell_measurement_theta_max       26.98 
 
_exptl_crystal_description        plate 
_exptl_crystal_colour             yellow 
_exptl_crystal_size_max           0.23 
_exptl_crystal_size_mid           0.21 
_exptl_crystal_size_min           0.08 
_exptl_crystal_density_meas       'not measured' 
_exptl_crystal_density_diffrn     1.337 
_exptl_crystal_density_method     'not measured' 
_exptl_crystal_F_000              1252 
_exptl_absorpt_coefficient_mu     0.562 
_exptl_absorpt_correction_type    none 
_exptl_absorpt_correction_T_min   ? 
_exptl_absorpt_correction_T_max   ? 
_exptl_absorpt_process_details    ? 
 
_exptl_special_details 
; 
 ? 
; 
 
_diffrn_ambient_temperature       293(2) 
_diffrn_radiation_wavelength      0.71073 
_diffrn_radiation_type            MoK\a 
_diffrn_radiation_source          'fine-focus sealed tube' 
_diffrn_radiation_monochromator   graphite 
_diffrn_radiation_detector	    'area detector' 
_diffrn_measurement_device_type   'Stoe IPDS'
_diffrn_measurement_method        'Rotation, \D\f=1.%'
_diffrn_detector_area_resol_mean  6.66
_diffrn_standards_decay_%         0
_diffrn_reflns_number             21226 
_diffrn_reflns_av_R_equivalents   0.0410 
_diffrn_reflns_av_sigmaI/netI     0.0624 
_diffrn_reflns_limit_h_min        -14 
_diffrn_reflns_limit_h_max        14 
_diffrn_reflns_limit_k_min        0 
_diffrn_reflns_limit_k_max        16 
_diffrn_reflns_limit_l_min        0 
_diffrn_reflns_limit_l_max        26 
_diffrn_reflns_theta_min          1.86 
_diffrn_reflns_theta_max          26.98 
_reflns_number_total              6572 
_reflns_number_gt                 3998 
_reflns_threshold_expression      >2sigma(I) 
 
_computing_data_collection        'EXPOSE (Stoe IPDS)'
_computing_cell_refinement        'SELECT (Stoe IPDS)'
_computing_data_reduction         'INTEGRATE (Stoe IPDS)'
_computing_structure_solution     'SHELXS-97 (Sheldrick, 1990)' 
_computing_structure_refinement   'SHELXL-97 (Sheldrick, 1997)' 
_computing_molecular_graphics     'DIAMOND (Brandenburg, 1999)'
_computing_publication_material   'SHELXL-97 (Sheldrick, 1997)'
 
_refine_special_details 
; 
 Refinement of F^2^ against ALL reflections.  The weighted R-factor wR and 
 goodness of fit S are based on F^2^, conventional R-factors R are based 
 on F, with F set to zero for negative F^2^. The threshold expression of 
 F^2^ > 2sigma(F^2^) is used only for calculating R-factors(gt) etc. and is 
 not relevant to the choice of reflections for refinement.  R-factors based 
 on F^2^ are statistically about twice as large as those based on F, and R- 
 factors based on ALL data will be even larger. 
; 
 
_refine_ls_structure_factor_coef  Fsqd  
_refine_ls_matrix_type            full 
_refine_ls_weighting_scheme       calc  
_refine_ls_weighting_details 
 'calc w=1/[\s^2^(Fo^2^)+(0.1579P)^2^+0.0000P] where P=(Fo^2^+2Fc^2^)/3' 
_atom_sites_solution_primary      direct 
_atom_sites_solution_secondary    difmap 
_atom_sites_solution_hydrogens    geom 
_refine_ls_hydrogen_treatment     mixed 
_refine_ls_extinction_method      SHELXL 
_refine_ls_extinction_coef        0.010(2) 
_refine_ls_extinction_expression 
 'Fc^*^=kFc[1+0.001xFc^2^\l^3^/sin(2\q)]^-1/4^' 
_refine_ls_number_reflns          6572 
_refine_ls_number_parameters      344 
_refine_ls_number_restraints      0 
_refine_ls_R_factor_all           0.0951 
_refine_ls_R_factor_gt            0.0719 
_refine_ls_wR_factor_ref          0.2188 
_refine_ls_wR_factor_gt           0.2029 
_refine_ls_goodness_of_fit_ref    0.923 
_refine_ls_restrained_S_all       0.923 
_refine_ls_shift/su_max           0.000 
_refine_ls_shift/su_mean          0.000 
 
loop_ 
 _atom_site_label 
 _atom_site_type_symbol 
 _atom_site_fract_x 
 _atom_site_fract_y 
 _atom_site_fract_z 
 _atom_site_U_iso_or_equiv 
 _atom_site_adp_type 
 _atom_site_occupancy 
 _atom_site_symetry_multiplicity 
 _atom_site_calc_flag 
 _atom_site_refinement_flags 
 _atom_site_disorder_assembly 
 _atom_site_disorder_group 
S1 S 0.62265(12) 0.14421(12) 0.24889(7) 0.0600(4) Uani 1 1 d . . . 
S2 S 0.53790(14) 0.13451(13) 0.38068(7) 0.0659(5) Uani 1 1 d . . . 
S3 S 0.51806(13) -0.07585(13) 0.10104(7) 0.0636(5) Uani 1 1 d . . . 
S4 S 0.60963(12) -0.10998(12) 0.23062(7) 0.0583(4) Uani 1 1 d . . . 
S5 S 0.86983(14) 0.20113(15) 0.28717(10) 0.0832(6) Uani 1 1 d . . . 
S6 S 0.85387(14) -0.16651(15) 0.18697(10) 0.0787(6) Uani 1 1 d . . . 
C1 C 0.5103(4) 0.1004(4) 0.2998(3) 0.0520(13) Uani 1 1 d . . . 
C2 C 0.7244(5) 0.1742(5) 0.3106(3) 0.0643(16) Uani 1 1 d . . . 
C3 C 0.6858(5) 0.1705(5) 0.3717(3) 0.0683(17) Uani 1 1 d . . . 
C4 C 0.9445(6) 0.0807(6) 0.3115(4) 0.088(2) Uani 1 1 d . . . 
H4A H 1.0254 0.0847 0.2969 0.106 Uiso 1 1 calc R . . 
H4B H 0.9475 0.0791 0.3582 0.106 Uiso 1 1 calc R . . 
C5 C 0.8933(6) -0.0239(6) 0.2883(4) 0.087(2) Uani 1 1 d . . . 
H5A H 0.9296 -0.0798 0.3130 0.104 Uiso 1 1 calc R . . 
H5B H 0.8092 -0.0251 0.2965 0.104 Uiso 1 1 calc R . . 
C6 C 0.9131(6) -0.0427(7) 0.2178(4) 0.098(2) Uani 1 1 d . . . 
H6A H 0.9974 -0.0409 0.2100 0.117 Uiso 1 1 calc R . . 
H6B H 0.8772 0.0138 0.1935 0.117 Uiso 1 1 calc R . . 
C7 C 0.7087(5) -0.1288(5) 0.1667(3) 0.0628(15) Uani 1 1 d . . . 
C8 C 0.6665(5) -0.1141(5) 0.1082(3) 0.0633(15) Uani 1 1 d . . . 
C9 C 0.4989(4) -0.0531(4) 0.1838(2) 0.0517(13) Uani 1 1 d . . . 
C10 C 0.4106(4) 0.0068(4) 0.2093(2) 0.0488(12) Uani 1 1 d . . . 
C11 C 0.4186(4) 0.0408(4) 0.2786(2) 0.0469(12) Uani 1 1 d . . . 
C12 C 0.3220(4) 0.0068(4) 0.3213(2) 0.0469(12) Uani 1 1 d . . . 
C13 C 0.2782(5) 0.0689(5) 0.3697(3) 0.0582(14) Uani 1 1 d . . . 
H13 H 0.3081 0.1357 0.3756 0.070 Uiso 1 1 calc R . . 
C14 C 0.1904(5) 0.0328(5) 0.4097(3) 0.0650(15) Uani 1 1 d . . . 
H14 H 0.1619 0.0754 0.4422 0.078 Uiso 1 1 calc R . . 
C15 C 0.1451(5) -0.0655(5) 0.4016(3) 0.0555(13) Uani 1 1 d . . . 
C16 C 0.1868(5) -0.1283(5) 0.3526(3) 0.0607(14) Uani 1 1 d . . . 
H16 H 0.1563 -0.1949 0.3467 0.073 Uiso 1 1 calc R . . 
C17 C 0.2736(5) -0.0919(4) 0.3124(3) 0.0556(13) Uani 1 1 d . . . 
H17 H 0.3001 -0.1337 0.2790 0.067 Uiso 1 1 calc R . . 
C18 C 0.0504(6) -0.1024(6) 0.4405(3) 0.0722(17) Uani 1 1 d . . . 
C19 C 0.3049(4) 0.0370(4) 0.1725(2) 0.0478(12) Uani 1 1 d . . . 
C20 C 0.2511(5) -0.0313(5) 0.1295(3) 0.0583(14) Uani 1 1 d . . . 
H20 H 0.2849 -0.0963 0.1226 0.070 Uiso 1 1 calc R . . 
C21 C 0.1481(5) -0.0050(5) 0.0965(3) 0.0615(15) Uani 1 1 d . . . 
H21 H 0.1136 -0.0518 0.0678 0.074 Uiso 1 1 calc R . . 
C22 C 0.0975(5) 0.0905(5) 0.1066(3) 0.0590(14) Uani 1 1 d . . . 
C23 C 0.1493(6) 0.1596(5) 0.1500(3) 0.0694(17) Uani 1 1 d . . . 
H23 H 0.1150 0.2244 0.1567 0.083 Uiso 1 1 calc R . . 
C24 C 0.2498(5) 0.1332(5) 0.1827(3) 0.0639(15) Uani 1 1 d . . . 
H24 H 0.2824 0.1797 0.2123 0.077 Uiso 1 1 calc R . . 
C25 C -0.0138(6) 0.1160(5) 0.0745(3) 0.0735(17) Uani 1 1 d . . . 
C26 C 0.7571(7) 0.1910(6) 0.4317(4) 0.094(2) Uani 1 1 d . . . 
H26A H 0.7735 0.1263 0.4532 0.141 Uiso 1 1 calc R . . 
H26B H 0.7133 0.2356 0.4598 0.141 Uiso 1 1 calc R . . 
H26C H 0.8300 0.2241 0.4206 0.141 Uiso 1 1 calc R . . 
C27 C 0.7314(7) -0.1245(7) 0.0449(4) 0.093(2) Uani 1 1 d . . . 
H27A H 0.7215 -0.0618 0.0202 0.139 Uiso 1 1 calc R . . 
H27B H 0.6998 -0.1823 0.0210 0.139 Uiso 1 1 calc R . . 
H27C H 0.8139 -0.1359 0.0535 0.139 Uiso 1 1 calc R . . 
N1 N -0.0286(6) -0.1304(6) 0.4698(3) 0.102(2) Uani 1 1 d . . . 
N2 N -0.1024(6) 0.1328(6) 0.0496(4) 0.105(2) Uani 1 1 d . . . 
Cl1 Cl 0.5241(4) 0.2243(3) 0.0716(2) 0.0965(12) Uani 0.50 1 d P . . 
Cl2 Cl 0.3274(4) 0.3704(3) 0.0653(2) 0.0980(13) Uani 0.50 1 d P . . 
C28 C 0.4697(12) 0.3458(13) 0.0837(8) 0.093(5) Uani 0.50 1 d P . . 
H28A H 0.5175 0.3939 0.0591 0.111 Uiso 0.50 1 calc PR . . 
H28B H 0.4820 0.3627 0.1289 0.111 Uiso 0.50 1 calc PR . . 
 
loop_ 
 _atom_site_aniso_label 
 _atom_site_aniso_U_11 
 _atom_site_aniso_U_22 
 _atom_site_aniso_U_33 
 _atom_site_aniso_U_23 
 _atom_site_aniso_U_13 
 _atom_site_aniso_U_12 
S1 0.0482(8) 0.0644(9) 0.0671(9) 0.0119(7) -0.0068(6) -0.0104(6) 
S2 0.0637(9) 0.0738(10) 0.0597(9) -0.0081(7) -0.0113(7) -0.0105(7) 
S3 0.0615(9) 0.0754(10) 0.0539(8) -0.0068(7) 0.0069(7) 0.0055(7) 
S4 0.0506(8) 0.0621(9) 0.0625(9) 0.0082(7) 0.0067(6) 0.0073(6) 
S5 0.0510(9) 0.0757(11) 0.1223(15) 0.0324(10) -0.0185(9) -0.0179(8) 
S6 0.0520(9) 0.0774(12) 0.1069(14) 0.0006(10) 0.0084(8) 0.0134(8) 
C1 0.050(3) 0.049(3) 0.057(3) 0.001(2) -0.007(2) 0.002(2) 
C2 0.051(3) 0.053(3) 0.088(5) 0.010(3) -0.016(3) -0.011(3) 
C3 0.067(4) 0.059(4) 0.079(4) 0.002(3) -0.026(3) -0.012(3) 
C4 0.056(4) 0.091(5) 0.118(6) 0.011(4) -0.010(4) -0.006(4) 
C5 0.065(4) 0.086(5) 0.109(6) 0.021(4) -0.013(4) -0.005(4) 
C6 0.053(4) 0.126(7) 0.114(6) 0.019(5) 0.000(4) -0.015(4) 
C7 0.051(3) 0.056(3) 0.082(4) 0.001(3) 0.013(3) 0.002(3) 
C8 0.057(3) 0.064(4) 0.069(4) -0.004(3) 0.013(3) 0.003(3) 
C9 0.052(3) 0.051(3) 0.053(3) -0.001(2) 0.006(2) -0.001(2) 
C10 0.044(3) 0.050(3) 0.052(3) -0.002(2) 0.000(2) -0.004(2) 
C11 0.041(2) 0.048(3) 0.051(3) -0.004(2) 0.000(2) 0.001(2) 
C12 0.041(2) 0.049(3) 0.051(3) -0.004(2) 0.000(2) 0.002(2) 
C13 0.056(3) 0.058(3) 0.061(3) -0.009(3) 0.005(3) -0.001(3) 
C14 0.056(3) 0.078(4) 0.061(3) -0.018(3) 0.008(3) 0.001(3) 
C15 0.046(3) 0.066(4) 0.054(3) -0.002(3) 0.002(2) -0.001(3) 
C16 0.057(3) 0.061(3) 0.064(3) -0.008(3) 0.008(3) -0.006(3) 
C17 0.053(3) 0.059(3) 0.055(3) -0.006(3) 0.010(2) -0.002(3) 
C18 0.066(4) 0.085(5) 0.065(4) -0.009(3) 0.016(3) -0.008(3) 
C19 0.044(3) 0.052(3) 0.047(3) -0.004(2) -0.002(2) -0.003(2) 
C20 0.058(3) 0.058(3) 0.059(3) -0.009(3) 0.000(3) 0.001(3) 
C21 0.057(3) 0.070(4) 0.057(3) -0.010(3) -0.011(3) 0.000(3) 
C22 0.055(3) 0.065(4) 0.057(3) 0.001(3) -0.008(3) 0.004(3) 
C23 0.068(4) 0.061(4) 0.079(4) -0.010(3) -0.020(3) 0.010(3) 
C24 0.062(3) 0.055(3) 0.073(4) -0.014(3) -0.017(3) 0.005(3) 
C25 0.075(4) 0.075(4) 0.070(4) -0.005(3) -0.019(3) 0.010(3) 
C26 0.095(5) 0.097(5) 0.090(5) 0.001(4) -0.041(4) -0.022(4) 
C27 0.081(5) 0.118(6) 0.081(5) -0.017(4) 0.033(4) 0.001(4) 
N1 0.096(4) 0.109(5) 0.102(5) -0.021(4) 0.046(4) -0.026(4) 
N2 0.087(4) 0.104(5) 0.122(5) -0.013(4) -0.050(4) 0.017(4) 
Cl1 0.090(2) 0.094(3) 0.105(3) -0.010(2) -0.023(2) 0.008(2) 
Cl2 0.088(2) 0.075(2) 0.131(3) -0.022(2) -0.040(2) 0.0047(19) 
C28 0.064(8) 0.092(11) 0.121(12) -0.045(9) -0.016(8) -0.007(7) 
 
_geom_special_details 
; 
 All esds (except the esd in the dihedral angle between two l.s. planes) 
 are estimated using the full covariance matrix.  The cell esds are taken 
 into account individually in the estimation of esds in distances, angles 
 and torsion angles; correlations between esds in cell parameters are only 
 used when they are defined by crystal symmetry.  An approximate (isotropic) 
 treatment of cell esds is used for estimating esds involving l.s. planes. 
; 
 
loop_ 
 _geom_bond_atom_site_label_1 
 _geom_bond_atom_site_label_2 
 _geom_bond_distance 
 _geom_bond_site_symmetry_2 
 _geom_bond_publ_flag 
S1 C2 1.754(6) . ? 
S1 C1 1.758(6) . ? 
S2 C3 1.749(6) . ? 
S2 C1 1.758(5) . ? 
S3 C8 1.756(6) . ? 
S3 C9 1.758(5) . ? 
S4 C9 1.737(5) . ? 
S4 C7 1.766(6) . ? 
S5 C2 1.758(6) . ? 
S5 C4 1.831(8) . ? 
S6 C7 1.759(6) . ? 
S6 C6 1.837(9) . ? 
C1 C11 1.358(7) . ? 
C2 C3 1.347(9) . ? 
C3 C26 1.499(9) . ? 
C4 C5 1.537(10) . ? 
C5 C6 1.504(11) . ? 
C7 C8 1.311(9) . ? 
C8 C27 1.520(9) . ? 
C9 C10 1.373(7) . ? 
C10 C19 1.464(7) . ? 
C10 C11 1.505(7) . ? 
C11 C12 1.483(7) . ? 
C12 C13 1.380(7) . ? 
C12 C17 1.392(7) . ? 
C13 C14 1.383(8) . ? 
C14 C15 1.373(9) . ? 
C15 C16 1.386(8) . ? 
C15 C18 1.432(8) . ? 
C16 C17 1.378(8) . ? 
C18 N1 1.146(8) . ? 
C19 C20 1.386(7) . ? 
C19 C24 1.401(8) . ? 
C20 C21 1.385(8) . ? 
C21 C22 1.371(8) . ? 
C22 C23 1.388(8) . ? 
C22 C25 1.455(8) . ? 
C23 C24 1.360(8) . ? 
C25 N2 1.142(8) . ? 
Cl1 C28 1.698(16) . ? 
Cl2 C28 1.681(14) . ? 
 
loop_ 
 _geom_angle_atom_site_label_1 
 _geom_angle_atom_site_label_2 
 _geom_angle_atom_site_label_3 
 _geom_angle 
 _geom_angle_site_symmetry_1 
 _geom_angle_site_symmetry_3 
 _geom_angle_publ_flag 
C2 S1 C1 96.0(3) . . ? 
C3 S2 C1 97.0(3) . . ? 
C8 S3 C9 95.4(3) . . ? 
C9 S4 C7 95.6(3) . . ? 
C2 S5 C4 100.8(3) . . ? 
C7 S6 C6 100.4(3) . . ? 
C11 C1 S2 125.1(4) . . ? 
C11 C1 S1 122.8(4) . . ? 
S2 C1 S1 111.9(3) . . ? 
C3 C2 S1 117.4(4) . . ? 
C3 C2 S5 125.8(5) . . ? 
S1 C2 S5 116.7(4) . . ? 
C2 C3 C26 126.7(6) . . ? 
C2 C3 S2 115.7(4) . . ? 
C26 C3 S2 117.5(6) . . ? 
C5 C4 S5 118.8(5) . . ? 
C6 C5 C4 112.6(7) . . ? 
C5 C6 S6 114.8(5) . . ? 
C8 C7 S6 126.0(5) . . ? 
C8 C7 S4 116.7(5) . . ? 
S6 C7 S4 117.3(4) . . ? 
C7 C8 C27 127.8(6) . . ? 
C7 C8 S3 117.0(5) . . ? 
C27 C8 S3 115.2(5) . . ? 
C10 C9 S4 122.9(4) . . ? 
C10 C9 S3 124.7(4) . . ? 
S4 C9 S3 112.3(3) . . ? 
C9 C10 C19 122.8(5) . . ? 
C9 C10 C11 119.8(4) . . ? 
C19 C10 C11 117.4(4) . . ? 
C1 C11 C12 122.6(5) . . ? 
C1 C11 C10 120.6(4) . . ? 
C12 C11 C10 116.8(4) . . ? 
C13 C12 C17 118.5(5) . . ? 
C13 C12 C11 122.7(5) . . ? 
C17 C12 C11 118.8(5) . . ? 
C12 C13 C14 120.8(6) . . ? 
C15 C14 C13 120.3(5) . . ? 
C14 C15 C16 119.6(5) . . ? 
C14 C15 C18 121.1(5) . . ? 
C16 C15 C18 119.2(6) . . ? 
C17 C16 C15 120.0(5) . . ? 
C16 C17 C12 120.7(5) . . ? 
N1 C18 C15 177.1(8) . . ? 
C20 C19 C24 117.6(5) . . ? 
C20 C19 C10 121.1(5) . . ? 
C24 C19 C10 121.2(5) . . ? 
C19 C20 C21 121.5(5) . . ? 
C22 C21 C20 119.6(5) . . ? 
C21 C22 C23 119.8(5) . . ? 
C21 C22 C25 119.5(5) . . ? 
C23 C22 C25 120.6(6) . . ? 
C24 C23 C22 120.5(6) . . ? 
C23 C24 C19 121.0(5) . . ? 
N2 C25 C22 177.8(8) . . ? 
Cl1 C28 Cl2 119.2(8) . . ? 
 
_diffrn_measured_fraction_theta_max    0.992 
_diffrn_reflns_theta_full              26.98 
_diffrn_measured_fraction_theta_full   0.992 
_refine_diff_density_max    1.260 
_refine_diff_density_min   -0.310 
_refine_diff_density_rms    0.122 

#===END

data_2d(4)2+ 
 
_publ_requested_journal           'Chemistry'
_publ_requested_category          FM

_audit_creation_method            SHELXL-97 
_chemical_name_systematic 
; 
 ? 
; 
_chemical_name_common             '(C28 H28 O2 S6) (I3)2'  
_chemical_formula_sum             'C28 H28 I6 O2 S6' 
_chemical_formula_weight          1350.26 
 
loop_ 
 _atom_type_symbol 
 _atom_type_description 
 _atom_type_scat_dispersion_real 
 _atom_type_scat_dispersion_imag 
 _atom_type_scat_source 
 'C'  'C'   0.0033   0.0016 
 'International Tables Vol C Tables 4.2.6.8 and 6.1.1.4' 
 'H'  'H'   0.0000   0.0000 
 'International Tables Vol C Tables 4.2.6.8 and 6.1.1.4' 
 'O'  'O'   0.0106   0.0060 
 'International Tables Vol C Tables 4.2.6.8 and 6.1.1.4' 
 'S'  'S'   0.1246   0.1234 
 'International Tables Vol C Tables 4.2.6.8 and 6.1.1.4' 
 'I'  'I'  -0.4742   1.8119 
 'International Tables Vol C Tables 4.2.6.8 and 6.1.1.4' 
 
_symmetry_cell_setting            monoclinic 
_symmetry_space_group_name_H-M    'P 2/n' 
 
loop_ 
 _symmetry_equiv_pos_as_xyz 
 'x, y, z' 
 '-x+1/2, y, -z+1/2' 
 '-x, -y, -z' 
 'x-1/2, -y, z-1/2' 
 
_cell_length_a                    7.9934(16) 
_cell_length_b                    13.652(3) 
_cell_length_c                    18.487(4) 
_cell_angle_alpha                 90.00 
_cell_angle_beta                  94.27(3) 
_cell_angle_gamma                 90.00 
_cell_volume                      2011.8(7) 
_cell_formula_units_Z             2 
_cell_measurement_temperature     293(2) 
_cell_measurement_reflns_used     2000 
_cell_measurement_theta_min       1.49 
_cell_measurement_theta_max       26.55 
 
_exptl_crystal_description        plate 
_exptl_crystal_colour             black 
_exptl_crystal_size_max           0.32 
_exptl_crystal_size_mid           0.11 
_exptl_crystal_size_min           0.05 
_exptl_crystal_density_meas       'not measured' 
_exptl_crystal_density_diffrn     2.229 
_exptl_crystal_density_method     'not measured' 
_exptl_crystal_F_000              1252 
_exptl_absorpt_coefficient_mu     4.968 
_exptl_absorpt_correction_type    numerical 
_exptl_absorpt_correction_T_min   0.5255 
_exptl_absorpt_correction_T_max   0.7835 
_exptl_absorpt_process_details    'FACEIT (Stoe IPDS)' 
 
_exptl_special_details 
; 
 ? 
; 
 
_diffrn_ambient_temperature       293(2) 
_diffrn_radiation_wavelength      0.71073 
_diffrn_radiation_type            MoK\a 
_diffrn_radiation_source          'fine-focus sealed tube' 
_diffrn_radiation_monochromator   graphite 
_diffrn_radiation_detector	    'area detector' 
_diffrn_measurement_device_type   'Stoe IPDS'
_diffrn_measurement_method        'Rotation, \D\f=1.%'
_diffrn_detector_area_resol_mean  6.66
_diffrn_standards_decay_%         0
_diffrn_reflns_number             5739 
_diffrn_reflns_av_R_equivalents   0.0457 
_diffrn_reflns_av_sigmaI/netI     0.0219 
_diffrn_reflns_limit_h_min        -10 
_diffrn_reflns_limit_h_max        10 
_diffrn_reflns_limit_k_min        -17 
_diffrn_reflns_limit_k_max        17 
_diffrn_reflns_limit_l_min        0 
_diffrn_reflns_limit_l_max        23 
_diffrn_reflns_theta_min          1.49 
_diffrn_reflns_theta_max          26.55 
_reflns_number_total              4189 
_reflns_number_gt                 3431 
_reflns_threshold_expression      >2sigma(I) 
 
_computing_data_collection        'EXPOSE (Stoe IPDS)'
_computing_cell_refinement        'SELECT (Stoe IPDS)'
_computing_data_reduction         'INTEGRATE (Stoe IPDS)'
_computing_structure_solution     'SHELXS-97 (Sheldrick, 1990)' 
_computing_structure_refinement   'SHELXL-97 (Sheldrick, 1997)' 
_computing_molecular_graphics     'DIAMOND (Brandenburg, 1999)'
_computing_publication_material   'SHELXL-97 (Sheldrick, 1997)'
 
_refine_special_details 
; 
 Refinement of F^2^ against ALL reflections.  The weighted R-factor wR and 
 goodness of fit S are based on F^2^, conventional R-factors R are based 
 on F, with F set to zero for negative F^2^. The threshold expression of 
 F^2^ > 2sigma(F^2^) is used only for calculating R-factors(gt) etc. and is 
 not relevant to the choice of reflections for refinement.  R-factors based 
 on F^2^ are statistically about twice as large as those based on F, and R- 
 factors based on ALL data will be even larger. 
; 
 
_refine_ls_structure_factor_coef  Fsqd  
_refine_ls_matrix_type            full 
_refine_ls_weighting_scheme       calc  
_refine_ls_weighting_details 
 'calc w=1/[\s^2^(Fo^2^)+(0.0642P)^2^+0.0000P] where P=(Fo^2^+2Fc^2^)/3' 
_atom_sites_solution_primary      direct 
_atom_sites_solution_secondary    difmap 
_atom_sites_solution_hydrogens    geom 
_refine_ls_hydrogen_treatment     mixed 
_refine_ls_extinction_method      none 
_refine_ls_extinction_coef        ? 
_refine_ls_number_reflns          4189 
_refine_ls_number_parameters      199 
_refine_ls_number_restraints      5 
_refine_ls_R_factor_all           0.0971 
_refine_ls_R_factor_gt            0.0366 
_refine_ls_wR_factor_ref          0.0969 
_refine_ls_wR_factor_gt           0.0803 
_refine_ls_goodness_of_fit_ref    0.889 
_refine_ls_restrained_S_all       0.889 
_refine_ls_shift/su_max           0.001 
_refine_ls_shift/su_mean          0.000 
 
loop_ 
 _atom_site_label 
 _atom_site_type_symbol 
 _atom_site_fract_x 
 _atom_site_fract_y 
 _atom_site_fract_z 
 _atom_site_U_iso_or_equiv 
 _atom_site_adp_type 
 _atom_site_occupancy 
 _atom_site_symetry_multiplicity 
 _atom_site_calc_flag 
 _atom_site_refinement_flags 
 _atom_site_disorder_assembly 
 _atom_site_disorder_group 
I1 I 0.06363(9) 0.17939(5) 0.43181(4) 0.0629(2) Uani 1 1 d . . . 
I2 I 0.14591(10) -0.02505(6) 0.39053(4) 0.0706(3) Uani 1 1 d . . . 
I3 I -0.01306(15) 0.37695(7) 0.46535(6) 0.1141(4) Uani 1 1 d . . . 
S1 S -0.0351(4) 0.1092(2) 0.23387(14) 0.0634(8) Uani 1 1 d . . . 
S2 S -0.1546(3) 0.02987(19) 0.09830(12) 0.0555(7) Uani 1 1 d . . . 
S3 S 0.0863(4) 0.2970(2) 0.16980(17) 0.0803(9) Uani 1 1 d . . . 
C1 C -0.1342(11) 0.0169(6) 0.1888(4) 0.042(2) Uani 1 1 d . . . 
C2 C -0.2001(12) -0.0726(6) 0.2223(5) 0.046(2) Uani 1 1 d . . . 
C3 C -0.0684(12) 0.1445(7) 0.0934(5) 0.052(3) Uani 1 1 d . . . 
C4 C -0.0152(12) 0.1839(7) 0.1593(5) 0.054(3) Uani 1 1 d . . . 
C5 C -0.1417(14) -0.1661(8) 0.1895(5) 0.055(3) Uani 1 1 d . . . 
C6 C 0.0278(14) -0.1836(8) 0.1925(6) 0.069(3) Uani 1 1 d . . . 
H6 H 0.1021 -0.1368 0.2125 0.083 Uiso 1 1 calc R . . 
C7 C 0.4104(17) -0.2708(9) 0.3341(6) 0.080(4) Uani 1 1 d . . . 
H7 H 0.2952 -0.2815 0.3318 0.097 Uiso 1 1 calc R . . 
C8 C 0.5159(19) -0.3401(9) 0.3632(7) 0.080(4) Uani 1 1 d D . . 
C9 C -0.188(2) -0.3230(9) 0.1307(6) 0.087(4) Uani 1 1 d . . . 
H9 H -0.2610 -0.3691 0.1090 0.104 Uiso 1 1 calc R . . 
C10 C -0.2497(16) -0.2348(8) 0.1579(6) 0.070(3) Uani 1 1 d . . . 
H10 H -0.3646 -0.2229 0.1545 0.084 Uiso 1 1 calc R . . 
C11 C -0.022(2) 0.3602(11) 0.2324(10) 0.126(6) Uani 1 1 d . . . 
H11A H 0.0000 0.3268 0.2785 0.151 Uiso 1 1 calc R . . 
H11B H 0.0298 0.4242 0.2378 0.151 Uiso 1 1 calc R . . 
C12 C -0.191(2) 0.3757(18) 0.2244(12) 0.202(11) Uani 1 1 d . . . 
H12A H -0.2325 0.3282 0.1884 0.242 Uiso 1 1 calc R . . 
H12B H -0.2034 0.4391 0.2010 0.242 Uiso 1 1 calc R . . 
C13 C -0.0602(14) 0.1926(7) 0.0213(5) 0.064(3) Uani 1 1 d . . . 
H13A H -0.1060 0.1494 -0.0161 0.096 Uiso 1 1 calc R . . 
H13B H 0.0546 0.2070 0.0134 0.096 Uiso 1 1 calc R . . 
H13C H -0.1238 0.2523 0.0202 0.096 Uiso 1 1 calc R . . 
C14A C 0.505(6) -0.470(2) 0.4480(14) 0.179(19) Uani 0.50 1 d PD . . 
H14A H 0.6207 -0.4541 0.4600 0.268 Uiso 0.50 1 calc PR . . 
H14B H 0.4924 -0.5394 0.4431 0.268 Uiso 0.50 1 calc PR . . 
H14C H 0.4388 -0.4468 0.4859 0.268 Uiso 0.50 1 calc PR . . 
O1 O 0.4531(18) -0.4266(7) 0.3860(6) 0.140(5) Uani 1 1 d D . . 
C14B C 0.291(3) -0.4572(18) 0.3798(18) 0.16(2) Uani 0.50 1 d PD . . 
H14D H 0.2355 -0.4308 0.3363 0.239 Uiso 0.50 1 calc PR . . 
H14E H 0.2353 -0.4351 0.4211 0.239 Uiso 0.50 1 calc PR . . 
H14F H 0.2880 -0.5275 0.3777 0.239 Uiso 0.50 1 calc PR . . 
 
loop_ 
 _atom_site_aniso_label 
 _atom_site_aniso_U_11 
 _atom_site_aniso_U_22 
 _atom_site_aniso_U_33 
 _atom_site_aniso_U_23 
 _atom_site_aniso_U_13 
 _atom_site_aniso_U_12 
I1 0.0565(4) 0.0760(5) 0.0570(4) -0.0044(4) 0.0095(3) -0.0090(4) 
I2 0.0713(5) 0.0719(5) 0.0690(5) 0.0042(4) 0.0088(4) 0.0102(4) 
I3 0.1399(10) 0.0869(7) 0.1141(8) -0.0331(6) 0.0007(7) 0.0077(6) 
S1 0.077(2) 0.0675(18) 0.0457(15) -0.0006(13) 0.0061(14) -0.0103(15) 
S2 0.0658(18) 0.0597(16) 0.0419(14) -0.0006(13) 0.0089(13) -0.0028(14) 
S3 0.086(2) 0.069(2) 0.088(2) -0.0150(17) 0.0206(18) -0.0230(17) 
C1 0.039(5) 0.047(6) 0.040(5) -0.007(4) 0.006(4) 0.007(4) 
C2 0.051(6) 0.043(5) 0.047(6) 0.000(4) 0.011(5) 0.002(5) 
C3 0.040(6) 0.064(7) 0.054(6) 0.005(5) 0.013(5) 0.001(5) 
C4 0.055(7) 0.050(6) 0.057(6) 0.005(5) 0.013(5) -0.002(5) 
C5 0.065(7) 0.064(7) 0.037(5) 0.014(5) 0.015(5) 0.009(6) 
C6 0.071(8) 0.067(7) 0.074(7) 0.002(6) 0.027(6) 0.010(6) 
C7 0.099(10) 0.067(8) 0.081(9) -0.017(7) 0.045(8) -0.035(8) 
C8 0.105(12) 0.058(8) 0.080(9) 0.002(7) 0.024(8) -0.009(8) 
C9 0.127(13) 0.062(8) 0.072(8) -0.013(7) 0.009(8) 0.004(8) 
C10 0.072(8) 0.077(8) 0.060(7) -0.014(6) -0.004(6) 0.000(7) 
C11 0.111(13) 0.100(11) 0.174(16) -0.023(10) 0.047(12) -0.015(9) 
C12 0.073(14) 0.33(3) 0.20(2) 0.00(2) 0.023(13) 0.062(16) 
C13 0.073(8) 0.071(7) 0.049(6) 0.018(6) 0.006(5) -0.011(6) 
C14A 0.31(7) 0.08(2) 0.15(3) -0.02(2) 0.01(4) 0.03(3) 
O1 0.230(15) 0.064(6) 0.130(9) 0.023(6) 0.046(9) -0.028(8) 
C14B 0.16(3) 0.065(18) 0.27(5) -0.01(2) 0.17(4) -0.06(2) 
 
_geom_special_details 
; 
 All esds (except the esd in the dihedral angle between two l.s. planes) 
 are estimated using the full covariance matrix.  The cell esds are taken 
 into account individually in the estimation of esds in distances, angles 
 and torsion angles; correlations between esds in cell parameters are only 
 used when they are defined by crystal symmetry.  An approximate (isotropic) 
 treatment of cell esds is used for estimating esds involving l.s. planes. 
; 
 
loop_ 
 _geom_bond_atom_site_label_1 
 _geom_bond_atom_site_label_2 
 _geom_bond_distance 
 _geom_bond_site_symmetry_2 
 _geom_bond_publ_flag 
I1 I3 2.8445(13) . ? 
I1 I2 2.9797(12) . ? 
S1 C1 1.677(9) . ? 
S1 C4 1.732(9) . ? 
S2 C1 1.679(9) . ? 
S2 C3 1.715(10) . ? 
S3 C11 1.728(14) . ? 
S3 C4 1.748(10) . ? 
C1 C2 1.483(12) . ? 
C2 C2 1.345(16) 2_455 ? 
C2 C5 1.501(12) . ? 
C3 C4 1.370(13) . ? 
C3 C13 1.491(13) . ? 
C5 C6 1.373(14) . ? 
C5 C10 1.376(14) . ? 
C6 C7 1.393(14) 2 ? 
C6 H6 0.9300 . ? 
C7 C8 1.352(16) . ? 
C7 C6 1.393(14) 2 ? 
C7 H7 0.9300 . ? 
C8 O1 1.362(11) . ? 
C8 C9 1.390(17) 2 ? 
C9 C8 1.390(17) 2 ? 
C9 C10 1.408(15) . ? 
C9 H9 0.9300 . ? 
C10 H10 0.9300 . ? 
C11 C12 1.363(19) . ? 
C11 H11A 0.9700 . ? 
C11 H11B 0.9700 . ? 
C12 C12 1.38(3) 2_455 ? 
C12 H12A 0.9700 . ? 
C12 H12B 0.9700 . ? 
C13 H13A 0.9600 . ? 
C13 H13B 0.9600 . ? 
C13 H13C 0.9600 . ? 
C14A O1 1.328(17) . ? 
C14A H14A 0.9600 . ? 
C14A H14B 0.9600 . ? 
C14A H14C 0.9600 . ? 
O1 C14B 1.358(17) . ? 
C14B H14D 0.9600 . ? 
C14B H14E 0.9600 . ? 
C14B H14F 0.9600 . ? 
 
loop_ 
 _geom_angle_atom_site_label_1 
 _geom_angle_atom_site_label_2 
 _geom_angle_atom_site_label_3 
 _geom_angle 
 _geom_angle_site_symmetry_1 
 _geom_angle_site_symmetry_3 
 _geom_angle_publ_flag 
I3 I1 I2 177.68(4) . . ? 
C1 S1 C4 96.6(5) . . ? 
C1 S2 C3 98.0(5) . . ? 
C11 S3 C4 105.3(6) . . ? 
C2 C1 S1 125.5(6) . . ? 
C2 C1 S2 119.4(7) . . ? 
S1 C1 S2 115.0(5) . . ? 
C2 C2 C1 124.5(4) 2_455 . ? 
C2 C2 C5 121.8(5) 2_455 . ? 
C1 C2 C5 113.7(7) . . ? 
C4 C3 C13 126.2(9) . . ? 
C4 C3 S2 114.2(7) . . ? 
C13 C3 S2 119.6(8) . . ? 
C3 C4 S1 115.9(7) . . ? 
C3 C4 S3 123.8(7) . . ? 
S1 C4 S3 120.1(6) . . ? 
C6 C5 C10 119.0(10) . . ? 
C6 C5 C2 117.9(10) . . ? 
C10 C5 C2 123.2(10) . . ? 
C5 C6 C7 120.6(12) . 2 ? 
C5 C6 H6 119.7 . . ? 
C7 C6 H6 119.7 2 . ? 
C8 C7 C6 120.7(12) . 2 ? 
C8 C7 H7 119.6 . . ? 
C6 C7 H7 119.6 2 . ? 
O1 C8 C7 119.7(13) . . ? 
O1 C8 C9 120.4(13) . 2 ? 
C7 C8 C9 119.9(11) . 2 ? 
C8 C9 C10 119.1(12) 2 . ? 
C8 C9 H9 120.5 2 . ? 
C10 C9 H9 120.5 . . ? 
C5 C10 C9 120.6(12) . . ? 
C5 C10 H10 119.7 . . ? 
C9 C10 H10 119.7 . . ? 
C12 C11 S3 123.2(16) . . ? 
C12 C11 H11A 106.5 . . ? 
S3 C11 H11A 106.5 . . ? 
C12 C11 H11B 106.5 . . ? 
S3 C11 H11B 106.5 . . ? 
H11A C11 H11B 106.5 . . ? 
C11 C12 C12 130(3) . 2_455 ? 
C11 C12 H12A 104.7 . . ? 
C12 C12 H12A 104.7 2_455 . ? 
C11 C12 H12B 104.7 . . ? 
C12 C12 H12B 104.7 2_455 . ? 
H12A C12 H12B 105.7 . . ? 
C3 C13 H13A 109.5 . . ? 
C3 C13 H13B 109.5 . . ? 
H13A C13 H13B 109.5 . . ? 
C3 C13 H13C 109.5 . . ? 
H13A C13 H13C 109.5 . . ? 
H13B C13 H13C 109.5 . . ? 
O1 C14A H14A 109.5 . . ? 
O1 C14A H14B 109.5 . . ? 
H14A C14A H14B 109.5 . . ? 
O1 C14A H14C 109.5 . . ? 
H14A C14A H14C 109.5 . . ? 
H14B C14A H14C 109.5 . . ? 
C14B O1 C14A 100(2) . . ? 
C14B O1 C8 127.8(17) . . ? 
C14A O1 C8 124(2) . . ? 
O1 C14B H14D 109.5 . . ? 
O1 C14B H14E 109.5 . . ? 
H14D C14B H14E 109.5 . . ? 
O1 C14B H14F 109.5 . . ? 
H14D C14B H14F 109.5 . . ? 
H14E C14B H14F 109.5 . . ? 
 
_diffrn_measured_fraction_theta_max    0.995 
_diffrn_reflns_theta_full              26.55 
_diffrn_measured_fraction_theta_full   0.995 
_refine_diff_density_max    0.624 
_refine_diff_density_min   -1.035 
_refine_diff_density_rms    0.120 

#===END
